# Supplementary material for: Preparation of Succinoglycan Hydrogel Coordinated With Fe3+ Ions for Controlled Drug Delivery
Source: Polymers (Basel). 2020 Apr 22;12(4):977. doi: 10.3390/polym12040977 (PMC7240483; doi:10.3390/polym12040977)
Supplement: Supplementary file 1 [file polymers-12-00977-s001.pdf]

## Supplementary Materials

# Preparation of Succinoglycan Hydrogel Coordinated With Fe<sup>3+</sup> Ions For Controlled Drug Delivery

Yiluo Hu <sup>1,†</sup>, Daham Jeong <sup>1,2,†</sup>, Yohan Kim <sup>1</sup>, Seonmok Kim <sup>1</sup> and Seunho Jung <sup>1,2,\*</sup>

<sup>1</sup> Department of Systems Biotechnology & Dept. of Bioscience and Biotechnology, Microbial Carbohydrate Resource Bank (MCRB), Center for Biotechnology Research in UBITA (CBRU), Konkuk University, Seoul 05029, Korea; lannyhu0806@hotmail.com (Y.H.); [amir@konkuk.ac.kr](mailto:amir@konkuk.ac.kr) (D.J.); [shsks1@hanmail.net](mailto:shsks1@hanmail.net) (Y.K.); [gkdurk9999@naver.com](mailto:gkdurk9999@naver.com) (S.K.)

<sup>2</sup> Institute for Ubiquitous Information Technology and Applications (UBITA), Center for Biotechnology Research in UBITA (CBRU), Konkuk University, Seoul 05029, Korea

<sup>†</sup> These authors contributed equally to this work.

\* Correspondence: [shjung@konkuk.ac.kr](mailto:shjung@konkuk.ac.kr); Tel.: +82-2-450-3520

Received: 25 March 2020; Accepted: 21 April 2020; Published: date

## Table of Contents

|                                                         |    |
|---------------------------------------------------------|----|
| 1. GPC data for succinoglycan .....                     | p2 |
| 2. <sup>1</sup> H NMR spectra of the succinoglycan..... | p3 |
| 3. Photographs of gelation test.....                    | p4 |
| 4. Fe-SEM analysis.....                                 | p5 |
| 5. Cytotoxicity study.....                              | p6 |

### 1. Gel permeation chromatography (GPC) analysis

#### Experimental section

The molecular weights of succinoglycan was carried out by gel permeation chromatography (GPC) with a separation module (Waters e2695). The column was equipped with 300 mm×7.8 mm Ultrahydrogel column with water at a flow rate of 1 mL/min. Polyethylene glycol with specific molecular weights (106, 202, 430, 1030, 4290, 5800, 12600, 26300, 44000, 222000, 450000 Da) were used as calibration standards.

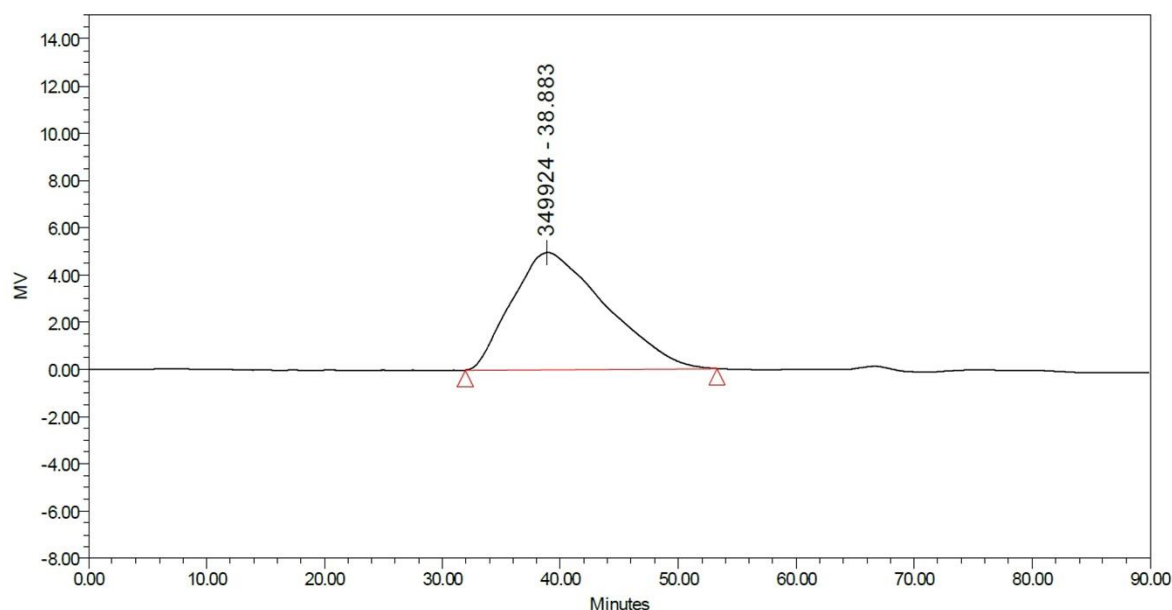

**Figure S1.** Determination of the molecular weight of succinoglycan via GPC.

**Table S1.** The molecular weight and GPC measurement of succinoglycan.

| Sample Name   | Mn     | Mw     | MP     | Polydispersity | % Area |
|---------------|--------|--------|--------|----------------|--------|
| Succinoglycan | 108571 | 354839 | 349924 | 3.268          | 100    |

## 2. $^1\text{H}$ NMR spectra of the succinoglycan

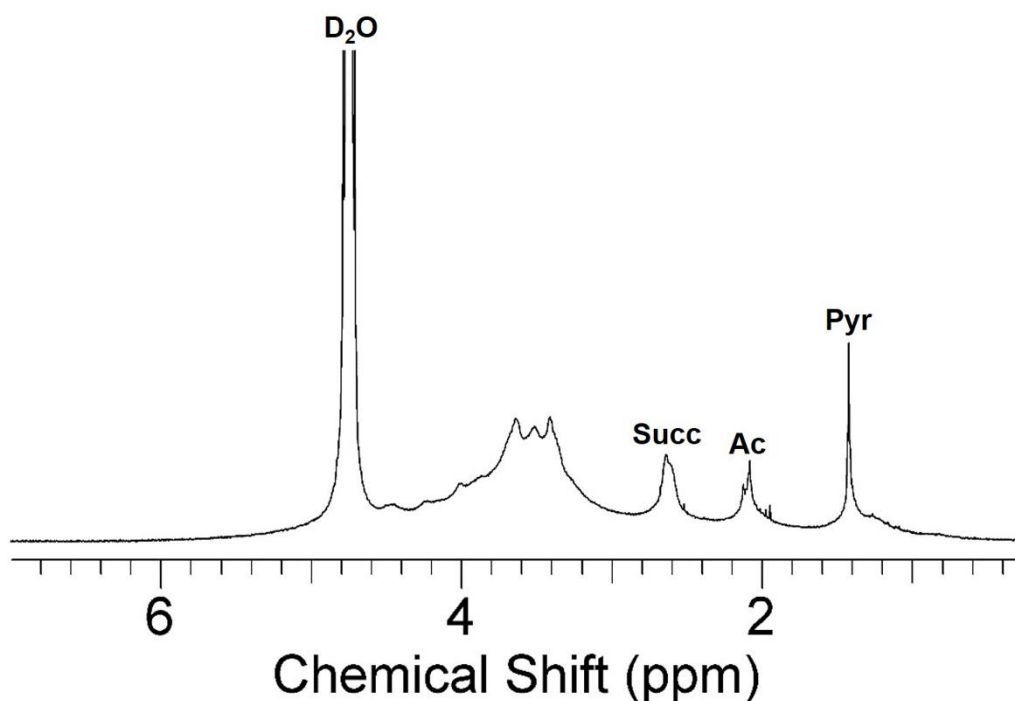

**Figure S2.** 500 MHz  $^1\text{H}$  NMR spectra of the succinoglycan isolated from *S. meliloti* Rm 1021. The chemical shift peak at 1.43 ppm represented methyl protons of the pyruvate (Pyr);

the peaks with shifts at 2.08 ppm represented methyl protons of acetyl groups (Ac); the broad peak at 2.64 ppm represented the methylene protons of the succinate groups (Succ).

### 3. Photographs of gelation test

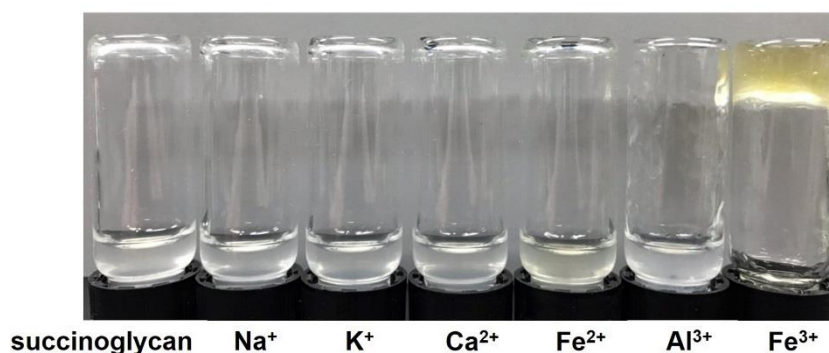

**Figure S3.** Photographs of gelation test of metal solution treated succinoglycan and original succinoglycan.

### 4. Fe-SEM analysis

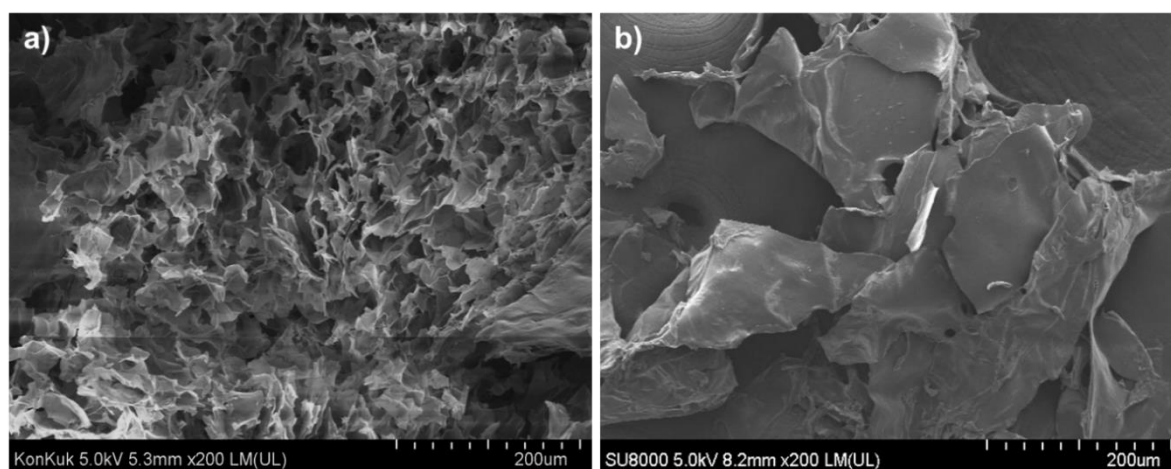

**Figure S4.** SEM images of Fe<sup>3+</sup>-SG hydrogel beads surface view of before release (a), and after release (b) of Congo red.

### 5. Cytotoxicity study

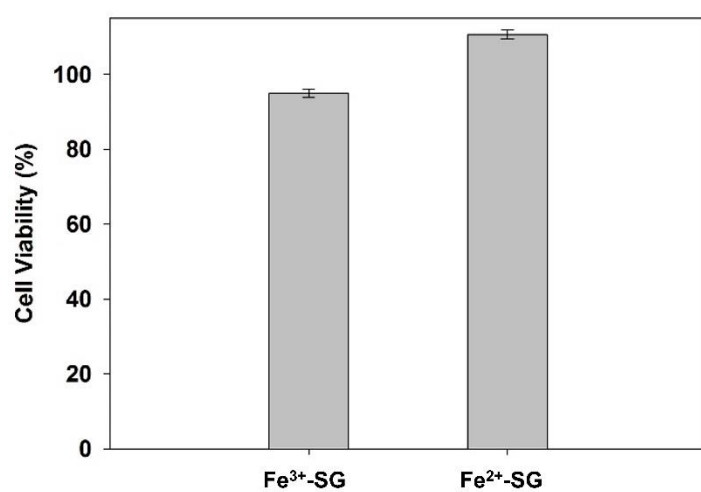

52

53 **Figure S5.** Cell viability of HEK 293 cells after treatment with Fe<sup>3+</sup>-SG and Fe<sup>2+</sup>-SG.
